# Supplementary material for: Caulobacter lipid A is conditionally dispensable in the absence of fur and in the presence of anionic sphingolipids
Source: PubMed Central journal article supplement — Cell Rep. Author manuscript; Available in PMC 2022 Aug 22. (PMC9393093; doi:10.1016/j.celrep.2022.110888), 2022-05-31
Supplement: NIHMS1812257-supplement-1.pdf [file NIHMS1812257-supplement-1.pdf]

**Supplemental information**

***Caulobacter* lipid A is conditionally dispensable  
in the absence of *fur* and in the presence  
of anionic sphingolipids**

**Justin J. Zik, Sung Hwan Yoon, Ziqiang Guan, Gabriele Stankeviciute Skidmore, Ridhi R. Gudoor, Karen M. Davies, Adam M. Deutschbauer, David R. Goodlett, Eric A. Klein, and Kathleen R. Ryan**

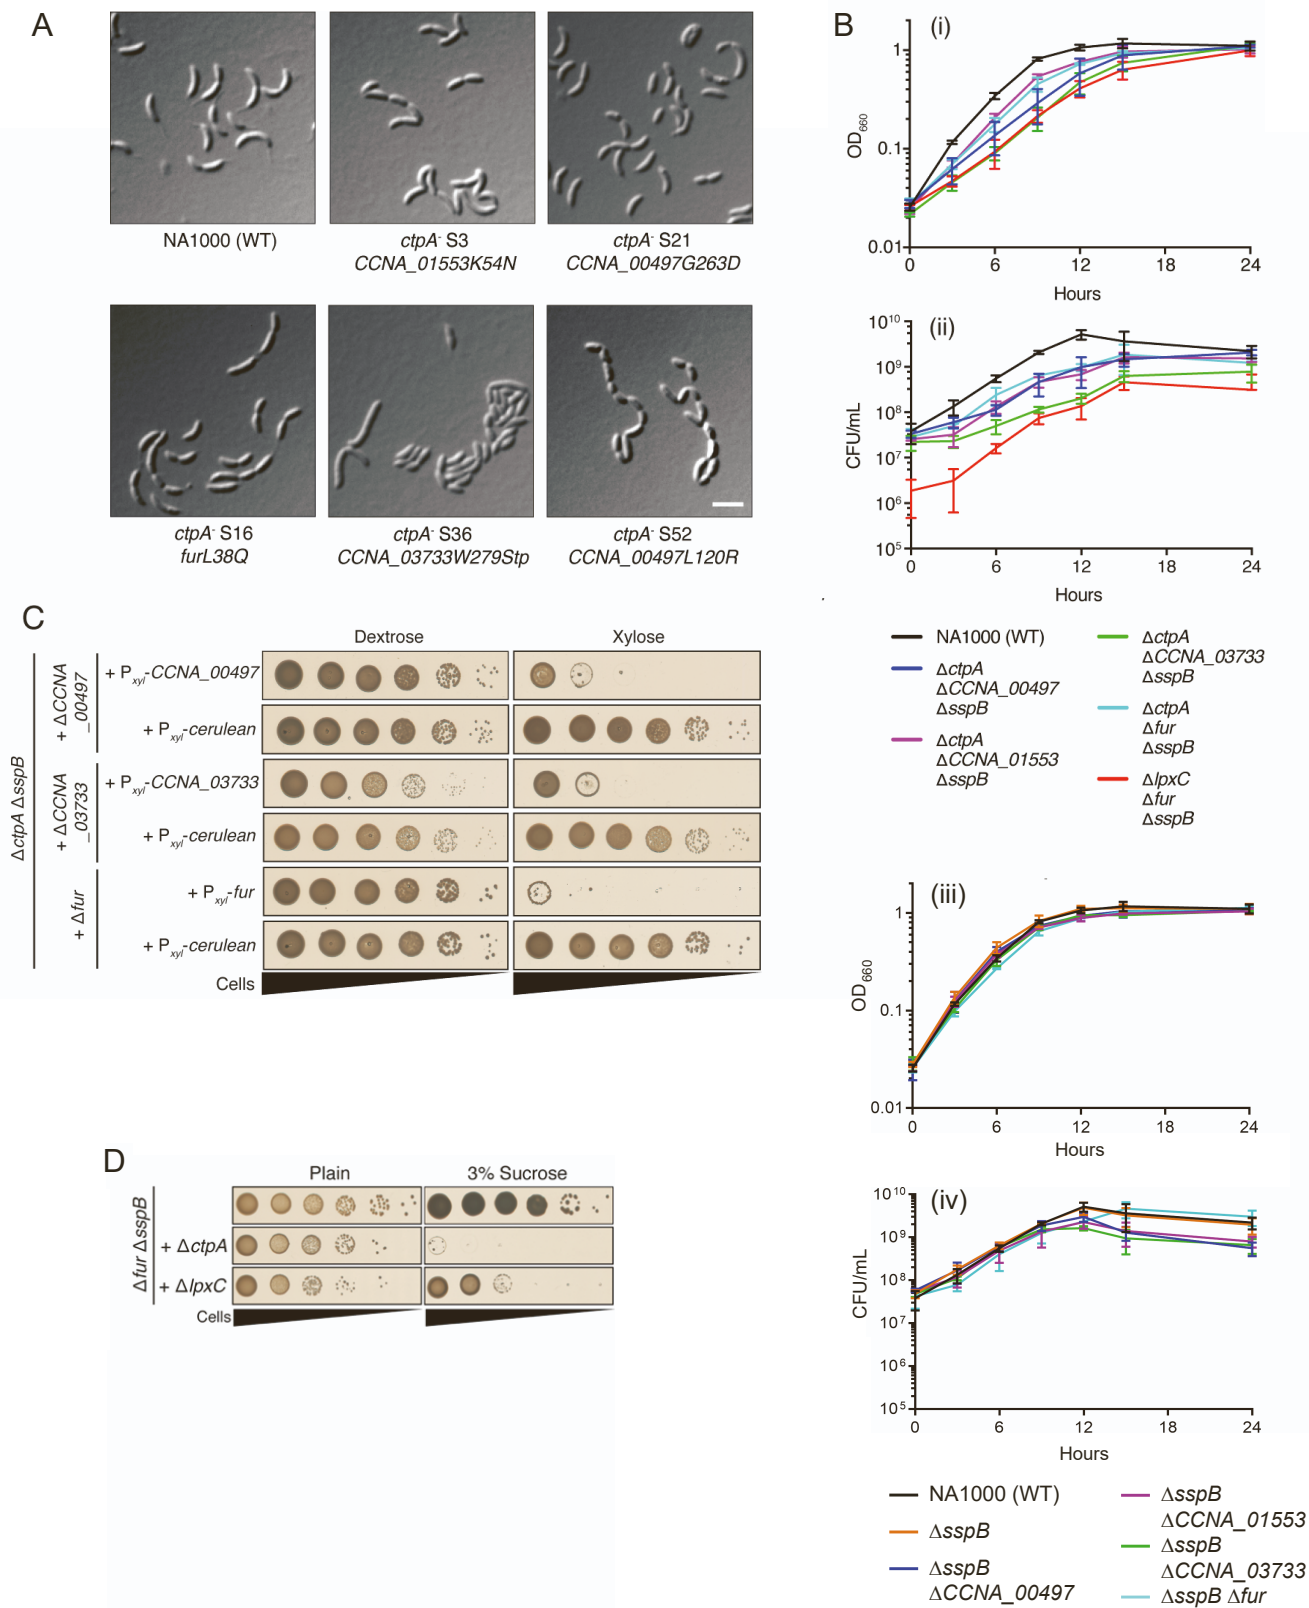

**Figure S1, related to Fig. 1:** Morphology, growth, and complementation of strains in which suppressor mutations permit the loss of *ctpA*. (A) Isolates from the  $\Delta ctpA$  suppressor screen show variations in morphology. DIC images of selected suppressor isolates confirmed to have lost the *ctpA* covering plasmid. Putative suppressor mutations identified by whole-genome resequencing are indicated. Scale bar, 3  $\mu\text{m}$ . (B) Growth curves of the indicated strains in PYE showing (i or iii)  $\text{OD}_{660}$  and (ii or iv) colony-forming units (CFU) per mL (mean  $\pm$  S.D.,  $N=3$ ). (C) Viability assays of  $\Delta ctpA$  suppressor mutants, each harboring a vector for xylose-driven expression of the corresponding suppressor gene or the *cerulean* gene as a control. Kanamycin was included in media to retain expression vectors. (D) Viability of the indicated strains on PYE medium (Plain) or PYE medium + 3% sucrose.

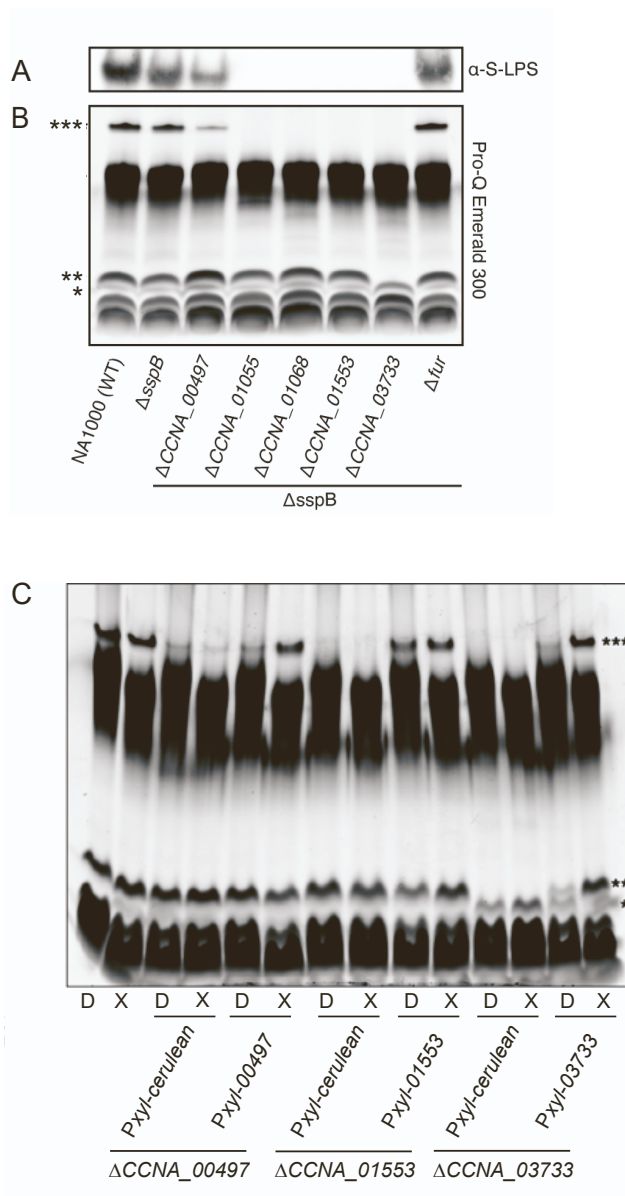

**Figure S2, related to Fig.1:** A subset of *ctpA* suppressor mutations impair or block S-LPS production. (A)  $\alpha$ -S-LPS-probed immunoblot and (B) Pro-Q Emerald 300-stained gel of Proteinase K-treated whole-cell lysates. (C) Complementation of O-antigen biosynthesis using plasmid-borne genes driven by a xylose-inducible promoter. Pro-Q Emerald 300-stained polyacrylamide gel of Proteinase K-treated whole-cell lysates of strains grown in either PYED (D) or PYEX (X). Samples were normalized by  $OD_{660}$ . \*\*\* = S-LPS, \*\* = putative full-length lipid A+core, \* = putative incomplete lipid A+core species in cells lacking *manC* activity (*CCNA\_03733*).

## A NA1000

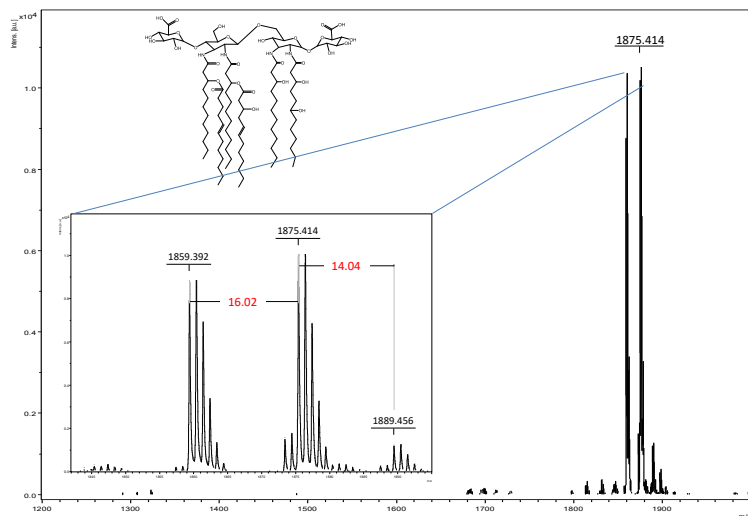B  $\Delta$ sspB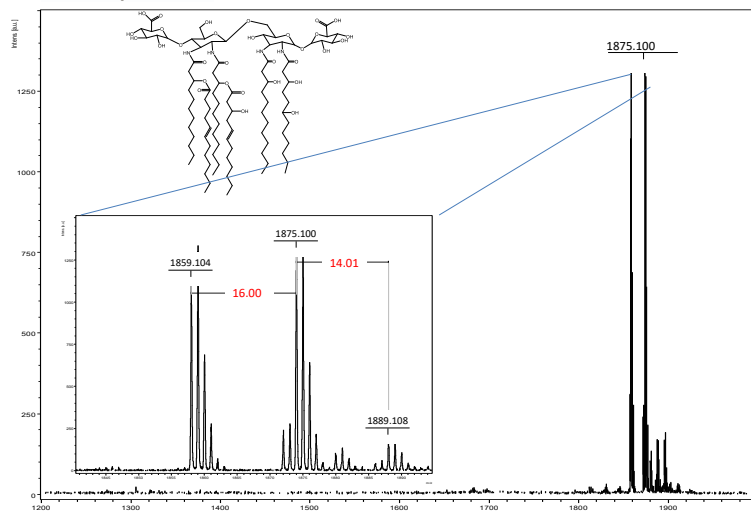C  $\Delta$ fur  $\Delta$ sspB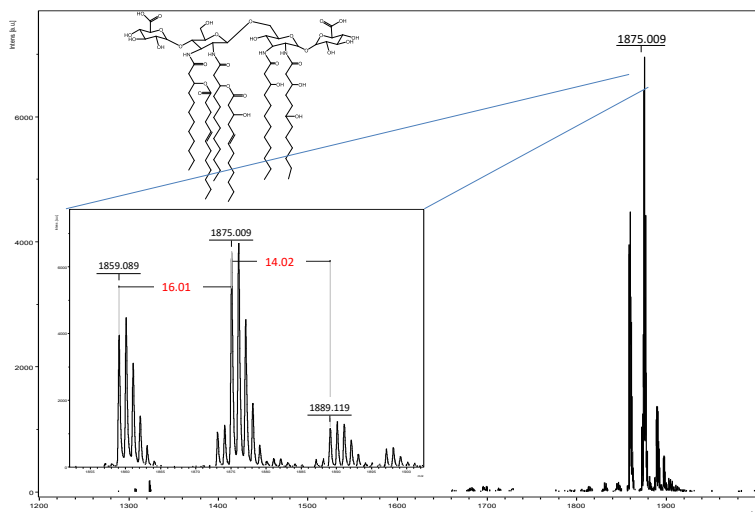D  $\Delta$ ctpA  $\Delta$ fur  $\Delta$ sspB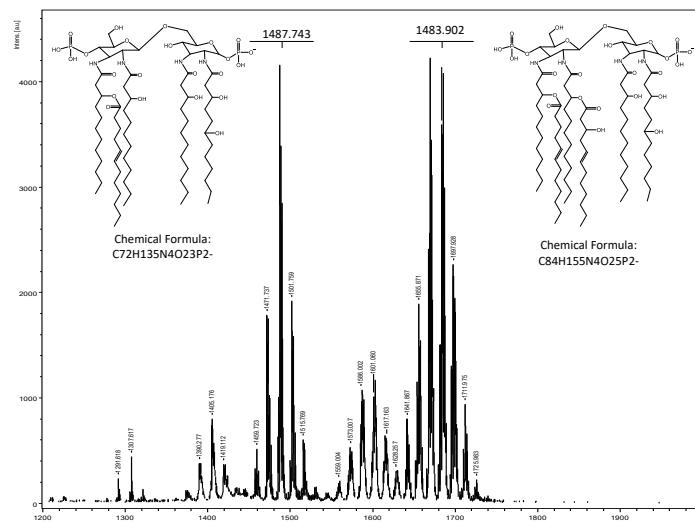E  $\Delta$ lpxC  $\Delta$ fur  $\Delta$ sspB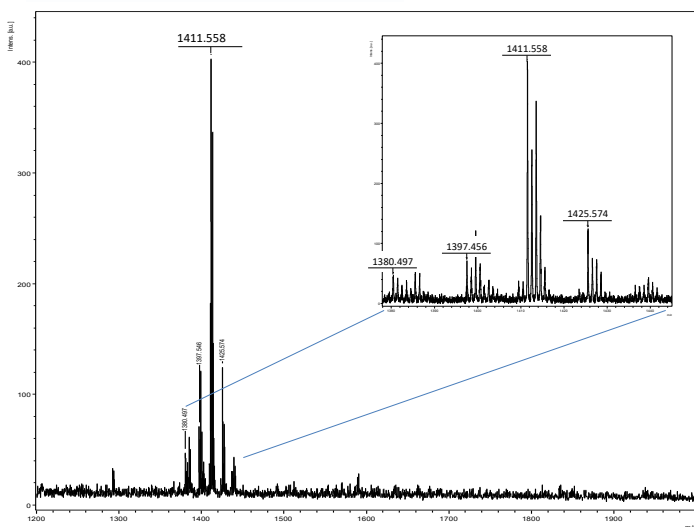

**Figure S3, related to Figure 2:**  $\Delta$ ctpA and  $\Delta$ lpxC strains with suppressor mutations lack wild-type lipid A. Tandem mass spectrometry (MS/MS)-derived structures of lipid A from the indicated strains. Lipid extraction and MS/MS analysis were performed as described in STAR Methods using the same protocols for all strains.

Figure S4

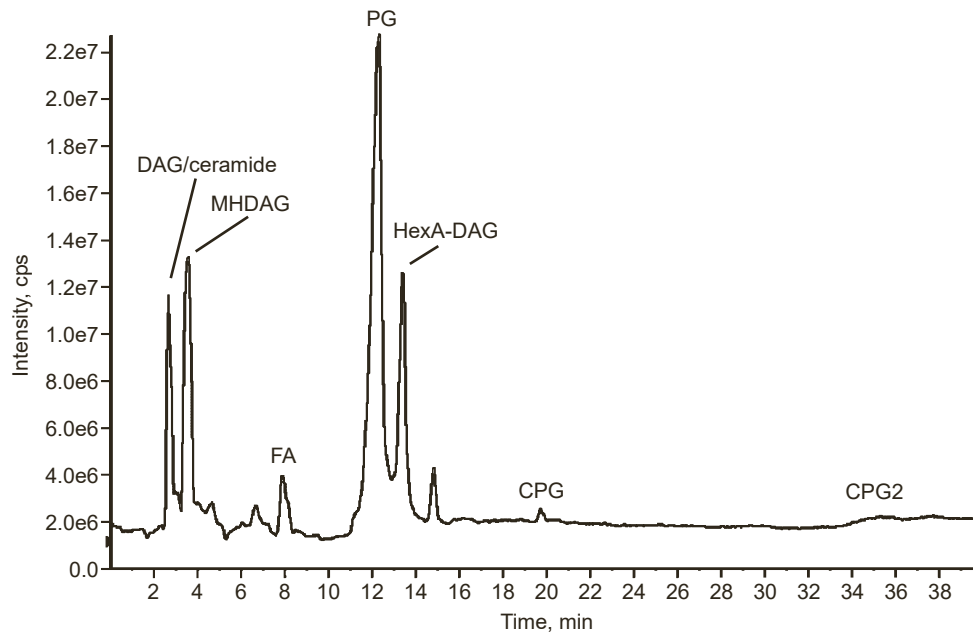

**Figure S4, related to Figure 6:** The total ion chromatogram of the *C. crescentus* lipidome shows the major lipid species present. DAG: diacylglycerol; MHDAG: mono-hexosyl diacylglycerol; FA: fatty acids; PG: phosphatidylglycerol; HexA-DAG: hexuronic acid-diacylglycerol; CPG: ceramide phosphoglycerate.

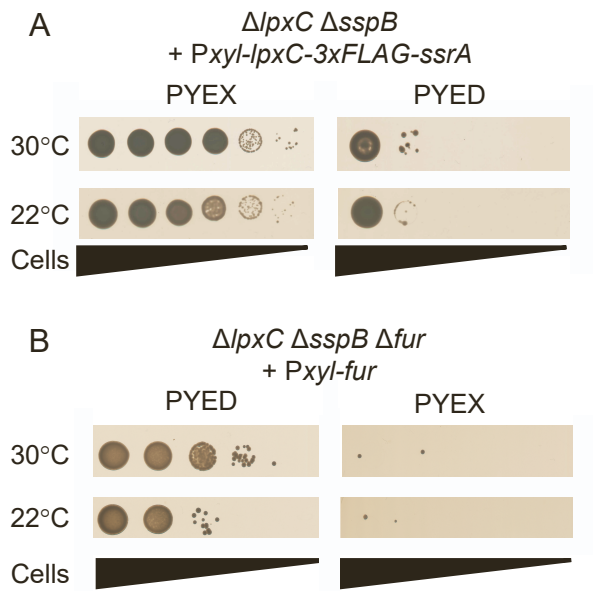

**Figure S5, related to Figure 3.** Slow growth at a reduced temperature in complex medium is insufficient for viability of  $\Delta lpxC$  strains. (A) Viability of the LpxC depletion strain grown in inducing (PYEX) or depleting (PYED) conditions, at the indicated temperatures. (B) Viability of the stable  $\Delta lpxC \Delta fur \Delta sspB$  strain harboring a P<sub>xyl</sub>-fur plasmid, grown in noninducing (PYED) or inducing (PYEX) conditions, at the indicated temperatures. Cells were plated from 10-fold serially diluted suspensions normalized to OD<sub>660</sub> = 0.1. Plates were incubated for 3 days (30°C) or 6 days (22°C) and are representative of at least three independent trials. Plates in B included kanamycin to retain the *fur* expression vector.

## Supplementary Tables

**Table S1, related to Figure 1: Single-nucleotide polymorphisms and indels in *ΔctpA* suppressors<sup>a</sup>**

| Strain | Sequence position <sup>b</sup> | Gene <sup>c</sup> | Annotation                                                                               | Base Change | Amino Acid Substitution |
|--------|--------------------------------|-------------------|------------------------------------------------------------------------------------------|-------------|-------------------------|
| S3     | 1668695                        | 01553             | Undecaprenyl-phosphate beta-N-acetyl-D-fucosaminophosphotransferase <sup>d</sup>         | G>T         | K54N                    |
| S3     | 2383967                        | 02235             | SGNH hydrolase family protein                                                            | G>A         | G109D                   |
| S8     | 3492550                        | 03316             | UDP-N-acetylglucosamine 4,6-dehydratase/UDP-D-quinovosamine 4-dehydrogenase <sup>d</sup> | AG>ATG      | E487Frameshift          |
| S16    | 58496                          | 00055             | Ferric uptake regulation protein                                                         | A>T         | L38Q                    |
| S21    | 515085                         | 00497             | Smooth LPS biosynthesis glycosyltransferase <sup>d</sup>                                 | G>A         | G263D                   |
| S21    | 1378399                        | 01250             | FecCD-family transporter protein                                                         | GCC>GC      | A340Frameshift          |
| S32    | 1157376                        | 01056             | Methyltransferase <sup>e</sup>                                                           | A>AG        | S31Framshift            |
| S32    | 2164248                        | 02016             | nuoMNADH-quinone oxidoreductase chain M                                                  | C>T         | M7I                     |
| S32    | 2949436                        | 02792             | TonB-dependent outer membrane receptor                                                   | A>G         | S516G                   |
| S36    | 3901011                        | 03733             | Mannose-1-phosphate guanylyltransferase <sup>d</sup>                                     | C>T         | W279Stop                |
| S38    | 726779                         | 00669             | Glycosyltransferase family 99 protein WbsX <sup>d</sup>                                  | CTG>CG      | Q476Frameshift          |
| S40    | 378822                         | 00362             | Zinc uptake regulation protein                                                           | A>T         | C156S                   |
| S40    | 2868272                        | -                 | -                                                                                        | G>C         | -                       |
| S40    | 3913883                        | 03744             | dTDP-glucose 4,6-dehydratase <sup>d</sup>                                                | T>A         | I269F                   |
| S43    | 1377138                        | 01249             | ABC-transporter substrate binding protein                                                | C>T         | A169V                   |
| S43    | 1668861                        | 01553             | Undecaprenyl-phosphate beta-N-acetyl-D-fucosaminophosphotransferase <sup>d</sup>         | CC>GA       | P110E                   |
| S43    | 2976030                        | 02820             | TadG-family protein                                                                      | C>T         | Silent                  |
| S44    | 727833                         | 00669             | Glycosyltransferase family 99 protein WbsX <sup>d</sup>                                  | A>C         | L125R                   |
| S47    | 537654                         | 00524             | Conserved hypothetical cytosolic protein                                                 | A>AG        | L369Frameshift          |
| S47    | 1173251                        | 01068             | Glycosyltransferase <sup>d</sup>                                                         | GCC>GC      | R293Frameshift          |
| S52    | 514656                         | 00497             | Smooth LPS biosynthesis glycosyltransferase <sup>d</sup>                                 | T>G         | L120R                   |
| S52    | 810384                         | 00752             | 3-hydroxybutyryl-CoA dehydrogenase                                                       | T>A         | Stop>Y                  |
| S52    | 3797776                        | -                 | -                                                                                        | T>C         | -                       |



|      |         |       |                                                                                          |        |                |
|------|---------|-------|------------------------------------------------------------------------------------------|--------|----------------|
| S53  | 58379   | 00055 | Ferric uptake regulation protein                                                         | G>T    | S77Stop        |
| S53  | 1778110 | 01656 | Endonuclease/exonuclease/phosphatase family protein                                      | A>C    | L4R            |
| S53  | 3900664 | 03733 | Mannose-1-phosphate guanylyltransferase <sup>d</sup>                                     | G>A    | Q395Stop       |
| S54  | 1377127 | 01249 | ABC-transporter substrate binding protein                                                | CGG>CG | G166Frameshift |
| S54  | 3492771 | 03316 | UDP-N-acetylglucosamine 4,6-dehydratase/UDP-D-quinovosamine 4-dehydrogenase <sup>d</sup> | G>A    | E561K          |
| S57  | 1492703 | 01378 | Protein-L-isoaspartate O-methyltransferase                                               | G>GC   | G59Frameshift  |
| S57  | 2487074 | 02347 | Phosphomannomutase/<br>phosphoglucomutase <sup>d</sup>                                   | G>A    | G266D          |
| S111 | 295119  | 00283 | 2,3,4,5-tetrahydropyridine-2,6-dicarboxylate N-succinyltransferase                       | A>T    | L284Q          |
| S111 | 1173965 | 01068 | Glycosyltransferase <sup>d</sup>                                                         | TGC>T  | R55Frameshift  |
| S112 | 311705  | 00297 | Two-component response regulator                                                         | C>T    | W64Stop        |
| S112 | 315570  | 00301 | Phosphotransferase family protein                                                        | T>G    | I319S          |
| S112 | 2487307 | 02347 | Phosphomannomutase/<br>phosphoglucomutase <sup>d</sup>                                   | G>A    | E344K          |
| S112 | 3569520 | 03399 | Flavin prenyltransferase UbiX                                                            | C>T    | A159T          |

<sup>a</sup>In addition to the indicated mutations, each strain is also  $\Delta ctpA \Delta sspB$ .

<sup>b</sup>Sequence positions refer to the genome of *Caulobacter crescentus* NA1000 (NC\_011916.1).

<sup>c</sup>The prefix for each gene number is *CCNA\_*.

<sup>d</sup>Genes known or predicted to be involved in O-antigen synthesis.

<sup>e</sup>We speculate that the frameshift in *CCNA\_01056* affects the expression of the downstream gene *CCNA\_01055*, annotated as a GT1 family glycosyltransferase.

**Table S2, related to Figure 3: Single-nucleotide polymorphisms and indels identified in  $\Delta lpxC$  suppressors<sup>a</sup>**

| Strain | Sequence position <sup>b</sup> | Gene <sup>c</sup> | Annotation                                | Base Change | Amino Acid Substitution |
|--------|--------------------------------|-------------------|-------------------------------------------|-------------|-------------------------|
| S1     | 58446                          | 00055             | Ferric uptake regulation protein Fur      | A>T         | Y55N                    |
|        | 4000704                        | 03835             | 3-oxoacyl-(Acyl-carrier-protein) synthase | C>T         | G396S                   |
| S5     | 58436                          | 00055             | Ferric uptake regulation protein Fur      | A>T         | V58E                    |

<sup>a</sup>In addition to the indicated mutations, each strain is also  $\Delta lpxC \Delta 00497$ .

<sup>b</sup>Sequence positions refer to the genome of *Caulobacter crescentus* NA1000 (NC\_011916.1).

<sup>c</sup>The prefix for each gene number is *CCNA\_*.

**Table S3, related to Fig. 2: Fur or iron regulation of genes predicted to participate in lipid synthesis.**

| Gene <sup>a</sup> | Name <sup>b</sup> | Regulation by Fur and/or iron <sup>c</sup>                           |
|-------------------|-------------------|----------------------------------------------------------------------|
| CCNA_00363        | <i>pgpB</i>       | None                                                                 |
| CCNA_01382        | <i>fadD</i>       | None                                                                 |
| CCNA_01431        | <i>plsX</i>       | None                                                                 |
| CCNA_01432        | <i>fabH</i>       | None                                                                 |
| CCNA_01746        | <i>fabD</i>       | None                                                                 |
| CCNA_01747        | <i>fabG</i>       | None                                                                 |
| CCNA_01750        | <i>fabF</i>       | None                                                                 |
| CCNA_01932        | <i>plsC</i>       | None                                                                 |
| CCNA_01960        | <i>accB</i>       | None                                                                 |
| CCNA_01961        | <i>accC</i>       | Downregulated by iron limitation only (Leaden, <i>et al.</i> , 2018) |
| CCNA_01977        | <i>plsB</i>       | None                                                                 |
| CCNA_01989        | <i>fabZ</i>       | None                                                                 |
| CCNA_01995        | <i>cdsA</i>       | None                                                                 |
| CCNA_02001        | <i>pgpC</i>       | None                                                                 |
| CCNA_02040        | <i>pgpC</i>       | None                                                                 |
| CCNA_02302        | <i>plsC</i>       | None                                                                 |
| CCNA_03002        | <i>pgsA</i>       | None                                                                 |
| CCNA_03090        | <i>accA</i>       | None                                                                 |
| CCNA_03656        | <i>accD</i>       | Upregulated by iron limitation only (Leaden, <i>et al.</i> , 2018)   |
| CCNA_03833        | <i>fabI</i>       | Downregulated by iron limitation only (Leaden, <i>et al.</i> , 2018) |
| CCNA_03835        | <i>fabB</i>       | None                                                                 |
| CCNA_03836        | <i>fabA</i>       | None                                                                 |

<sup>a</sup>Gene numbers refer to the genome of *Caulobacter crescentus* NA1000 (NC\_011916.1).

<sup>b</sup>Names are derived from annotations in NCBI associated with NC\_011916.1 or from BLAST or PSI-BLAST searches of the *Caulobacter crescentus* NA1000 genome initiated with the indicated *E. coli* amino acid sequence ((Altschul, 1997; Altschul *et al.*, 1990).

<sup>c</sup>Gene regulation was assessed by inspection of results (Leaden *et al.*, 2018; da Silva Neto *et al.*, 2013).

**Table S4, related to Figure 5: Genes whose average fitness scores were lower in CHIR-090-treated cultures than in control cultures by >1.**

| Gene <sup>a</sup> | Average fitness PYE <sup>b</sup> | Average fitness PYE + 2 µg/ml CHIR-090 <sup>c</sup> | Net average fitness <sup>d</sup> | Annotation                                                                               |
|-------------------|----------------------------------|-----------------------------------------------------|----------------------------------|------------------------------------------------------------------------------------------|
| CCNA_03609        | -0.287                           | -3.176                                              | -2.889                           | Outer membrane protein                                                                   |
| CCNA_01222        | -0.290                           | -2.953                                              | -2.662                           | NADH-ubiquinone oxidoreductase ( <i>cerR</i> )                                           |
| CCNA_03983        | -0.726                           | -3.246                                              | -2.520                           | HicA-related toxin-antitoxin protein                                                     |
| CCNA_01060        | 0.175                            | -2.191                                              | -2.365                           | Type I protein secretion ATP-binding protein, RsaD                                       |
| CCNA_01638        | 0.122                            | -2.195                                              | -2.317                           | Beta-lactamase family protein                                                            |
| CCNA_01162        | -0.391                           | -2.668                                              | -2.277                           | Beta-D-glucoside glucohydrolase                                                          |
| CCNA_01220        | 0.019                            | -2.222                                              | -2.240                           | <a href="#">BioF-family ceramide biosynthesis protein CcbF</a> ( <i>spt</i> )            |
| CCNA_01223        | -0.354                           | -2.549                                              | -2.195                           | Acyl-CoA synthetase ( <i>acps</i> )                                                      |
| CCNA_03026        | -1.443                           | -3.605                                              | -2.162                           | Two-component response regulator, PetR                                                   |
| CCNA_01817        | -0.016                           | -2.139                                              | -2.123                           | Nitrogen assimilatory regulatory protein, NtrX                                           |
| CCNA_01212        | -0.470                           | -2.589                                              | -2.120                           | dATP pyrophosphohydrolase ( <i>bcerS</i> )                                               |
| CCNA_01219        | -0.383                           | -2.337                                              | -1.955                           | Putative cytosolic protein ( <i>cpgC</i> )                                               |
| CCNA_01067        | 0.164                            | -1.730                                              | -1.894                           | Type I secretion outer membrane protein RsaFa                                            |
| CCNA_00252        | -0.523                           | -2.345                                              | -1.822                           | Multimodular transpeptidase-transglycosylase PbpX                                        |
| CCNA_01217        | -1.063                           | -2.808                                              | -1.746                           | Phosphatidylglycerophosphate synthase ( <i>cpgA</i> )                                    |
| CCNA_02127        | 0.155                            | -1.521                                              | -1.676                           | <a href="#">Bifunctional lysylphosphatidylglycerol flippase/synthetase MprF</a>          |
| CCNA_00525        | -1.296                           | -2.941                                              | -1.645                           | <a href="#">Prolipoprotein diacylglyceryl transferase</a>                                |
| CCNA_03027        | -0.219                           | -1.855                                              | -1.636                           | Two-component sensor histidine kinase                                                    |
| CCNA_03321        | 0.202                            | -1.390                                              | -1.593                           | VanZ superfamily protein                                                                 |
| CCNA_01218        | -0.894                           | -2.458                                              | -1.564                           | <a href="#">Sphingosine kinase/diacylglycerol kinase-related protein</a> ( <i>cpgB</i> ) |
| CCNA_03864        | -0.087                           | -1.572                                              | -1.485                           | DUF3576 domain-containing protein                                                        |
| CCNA_00001        | -0.980                           | -2.436                                              | -1.456                           | Pyruvate, phosphate dikinase regulatory protein                                          |
| CCNA_01427        | -0.619                           | -2.040                                              | -1.421                           | Beta-barrel assembly machine protein BamE                                                |
| CCNA_03876        | 0.509                            | -0.880                                              | -1.389                           | Transcription termination factor rho                                                     |
| CCNA_00512        | -0.689                           | -2.035                                              | -1.345                           | <a href="#">GTP-binding protein, probable translation factor</a>                         |
| CCNA_00050        | -1.925                           | -3.242                                              | -1.317                           | <a href="#">Apolipoprotein N-acyltransferase Lnt</a>                                     |

|            |        |        |        |                                                                         |
|------------|--------|--------|--------|-------------------------------------------------------------------------|
| CCNA_00190 | -0.624 | -1.885 | -1.261 | Acyl-CoA hydrolase                                                      |
| CCNA_02386 | -0.650 | -1.875 | -1.225 | O-antigen ligase related enzyme                                         |
| CCNA_00080 | 0.341  | -0.862 | -1.203 | LexA-related transcriptional repressor                                  |
| CCNA_00924 | 0.373  | -0.813 | -1.186 | MarR/EmrR family transcriptional regulator                              |
| CCNA_00354 | -0.212 | -1.384 | -1.172 | NlpC/P60 CHAP domain amidase protein                                    |
| CCNA_00027 | 0.109  | -1.045 | -1.154 | 2OG-Fe(II) oxygenase                                                    |
| CCNA_01324 | -0.445 | -1.588 | -1.143 | LSU ribosomal protein L30P                                              |
| CCNA_01226 | -1.084 | -2.210 | -1.126 | <a href="#">OstA family protein</a>                                     |
| CCNA_01221 | -0.499 | -1.623 | -1.124 | acyl carrier protein ( <i>acp</i> )                                     |
| CCNA_00851 | 0.073  | -1.030 | -1.103 | <a href="#">periplasmic multidrug efflux lipoprotein precursor</a>      |
| CCNA_03782 | -1.055 | -2.153 | -1.098 | <a href="#">cytochrome c biogenesis ATP-binding export protein CcmA</a> |
| CCNA_03336 | -3.118 | -4.188 | -1.071 | <a href="#">Tol-Pal system periplasmic component YbgF</a>               |
| CCNA_03820 | -1.783 | -2.837 | -1.055 | <a href="#">LolA-family outer membrane lipoprotein carrier protein</a>  |
| CCNA_03260 | 0.243  | -0.810 | -1.054 | queuosine biosynthesis protein QueD                                     |
| CCNA_00850 | 0.065  | -0.980 | -1.045 | <a href="#">cation/multidrug efflux pump acrB2</a>                      |
| CCNA_02081 | 0.006  | -1.013 | -1.019 | <a href="#">Sec-independent protein translocase protein tatB</a>        |
| CCNA_00735 | 0.361  | -0.644 | -1.005 | beta-barrel assembly machine protein BamF                               |

<sup>a</sup>Gene numbers refer to the genome of *Caulobacter crescentus* NA1000 (NC\_011916.1).

<sup>b</sup>Average fitness in PYE was calculated from fitness values in set8IT011, set8IT023, and set8IT035.

<sup>c</sup>Average fitness in PYE + 2 µg/ml CHIR-090 was calculated from fitness values in set8IT012, set8IT024, and set8IT036.

<sup>d</sup>Net average fitness = (Average fitness PYE + 2 µg/ml CHIR-090)-(Average fitness PYE).

**Table S5, related to Figure 3: Growth rates in PYE medium at 22°C.**

| Strain                   | Doubling time +/- standard deviation (hours) <sup>a</sup> |               |
|--------------------------|-----------------------------------------------------------|---------------|
|                          | PYE 30°C                                                  | PYE 22°C      |
| NA1000                   | 1.61 +/- 0.04                                             | 2.50 +/- 0.17 |
| $\Delta sspB$            | 1.51 +/- 0.04                                             | 2.44 +/- 0.09 |
| $\Delta fur \Delta sspB$ | 1.77 +/- 0.08                                             | 3.16 +/- 0.21 |

<sup>a</sup>Doubling times were calculated from optical density measurements (660 nm) during exponential growth.

**Table S6, related to STAR Methods: Strains used in this study.**

| Strain Number | Description <sup>a</sup>                                                                       | NCBI BioSample Accession <sup>b</sup> or Note | Reference                   |
|---------------|------------------------------------------------------------------------------------------------|-----------------------------------------------|-----------------------------|
| KR4000        | Wild-type <i>Caulobacter</i> NA1000                                                            |                                               | (Evinger and Agabian, 1977) |
| KR3180        | NA1000 pJS14                                                                                   |                                               | This study                  |
| KR1499        | $\Delta$ <i>sspB::aadA</i>                                                                     |                                               | (Shapland et al., 2011)     |
| KR3877        | $\Delta$ <i>CCNA_00497::hyg</i>                                                                |                                               | This study                  |
| KR4198        | $\Delta$ <i>CCNA_00497::hyg</i> pJS14                                                          |                                               | This study                  |
| KR3871        | $\Delta$ <i>CCNA_01553::hyg</i>                                                                |                                               | This study                  |
| KR4197        | $\Delta$ <i>CCNA_01553::hyg</i> pJS14                                                          |                                               | This study                  |
| KR4076        | $\Delta$ <i>fur::hyg</i>                                                                       |                                               | This study                  |
| KR4199        | $\Delta$ <i>fur::hyg</i> pJS14                                                                 |                                               | This study                  |
| KR3953        | $\Delta$ <i>CCNA_00497::hyg</i> $\Delta$ <i>sspB::aadA</i>                                     |                                               | This study                  |
| KR4115        | $\Delta$ <i>CCNA_01055::hyg</i> $\Delta$ <i>sspB::aadA</i>                                     |                                               | This study                  |
| KR4116        | $\Delta$ <i>CCNA_01068::hyg</i> $\Delta$ <i>sspB::aadA</i>                                     |                                               | This study                  |
| KR3954        | $\Delta$ <i>CCNA_01553::hyg</i> $\Delta$ <i>sspB::aadA</i>                                     |                                               | This study                  |
| KR3955        | $\Delta$ <i>CCNA_03733::hyg</i> $\Delta$ <i>sspB::aadA</i>                                     |                                               | This study                  |
| KR4077        | $\Delta$ <i>fur::hyg</i> $\Delta$ <i>sspB::aadA</i>                                            |                                               | This study                  |
| KR4153        | $\Delta$ <i>sspB::aadA</i> pXCERN-2                                                            |                                               | This study                  |
| KR4154        | $\Delta$ <i>CCNA_00497::hyg</i> $\Delta$ <i>sspB::aadA</i> pXCERN-2                            |                                               | This study                  |
| KR4155        | $\Delta$ <i>CCNA_01553::hyg</i> $\Delta$ <i>sspB::aadA</i> pXCERN-2                            |                                               | This study                  |
| KR4156        | $\Delta$ <i>CCNA_03733::hyg</i> $\Delta$ <i>sspB::aadA</i> pXCERN-2                            |                                               | This study                  |
| KR4157        | $\Delta$ <i>fur::hyg</i> $\Delta$ <i>sspB::aadA</i> pXCERN-2                                   |                                               | This study                  |
| KR4158        | $\Delta$ <i>CCNA_00497::hyg</i> $\Delta$ <i>sspB::aadA</i> pZIK172                             |                                               | This study                  |
| KR4159        | $\Delta$ <i>CCNA_01553::hyg</i> $\Delta$ <i>sspB::aadA</i> pZIK173                             |                                               | This study                  |
| KR4160        | $\Delta$ <i>CCNA_03733::hyg</i> $\Delta$ <i>sspB::aadA</i> pZIK174                             |                                               | This study                  |
| KR4161        | $\Delta$ <i>fur::hyg</i> $\Delta$ <i>sspB::aadA</i> pZIK175                                    |                                               | This study                  |
| KR4269        | $\Delta$ <i>fur::hyg</i> $\Delta$ <i>sspB::aadA</i> pZIK197                                    |                                               | This study                  |
| KR3906        | $\Delta$ <i>ctpA::tetAR</i> $\Delta$ <i>sspB::aadA</i> pAB6                                    | Restock of KR2423 from Shapland 2011          | (Shapland et al., 2011)     |
| KR4111        | $\Delta$ <i>ctpA::tetAR</i> $\Delta$ <i>sspB::aadA</i> $\Delta$ <i>CCNA_00497::hyg</i> pAB6    | SAMN12568762                                  | This study                  |
| KR4112        | $\Delta$ <i>ctpA::tetAR</i> $\Delta$ <i>sspB::aadA</i> $\Delta$ <i>CCNA_01553::hyg</i> pAB6    | SAMN12568763                                  | This study                  |
| KR4092        | $\Delta$ <i>ctpA::tetAR</i> $\Delta$ <i>sspB::aadA</i> $\Delta$ <i>CCNA_03733::hyg</i> pAB6    | SAMN12568761                                  | This study                  |
| KR4090        | $\Delta$ <i>ctpA::tetAR</i> $\Delta$ <i>sspB::aadA</i> $\Delta$ <i>fur::hyg</i> pAB6           | SAMN12568759                                  | This study                  |
| KR4007        | $\Delta$ <i>lpxC::tetAR</i> $\Delta$ <i>sspB::aadA</i> pZIK133                                 |                                               | This study                  |
| KR4008        | $\Delta$ <i>lpxC::tetAR</i> $\Delta$ <i>sspB::aadA</i> $\Delta$ <i>CCNA_00497::hyg</i> pZIK133 |                                               | This study                  |
| KR4223        | $\Delta$ <i>lpxC::tetAR</i> $\Delta$ <i>CCNA_00497::hyg</i> pZIK133                            |                                               | This study                  |
| KR4009        | $\Delta$ <i>lpxC::tetAR</i> $\Delta$ <i>sspB::aadA</i> $\Delta$ <i>CCNA_01553::hyg</i> pZIK133 |                                               | This study                  |
| KR4010        | $\Delta$ <i>lpxC::tetAR</i> $\Delta$ <i>sspB::aadA</i> $\Delta$ <i>CCNA_03733::hyg</i> pZIK133 |                                               | This study                  |
| KR4091        | $\Delta$ <i>lpxC::tetAR</i> $\Delta$ <i>sspB::aadA</i> $\Delta$ <i>fur::hyg</i> pZIK133        | SAMN12568760                                  | This study                  |

|        |                                                                                                    |                   |                              |
|--------|----------------------------------------------------------------------------------------------------|-------------------|------------------------------|
| KR4113 | <i>ΔctpA::tetAR ΔsspB::aadA ΔCCNA_00497::hyg</i>                                                   | SAMN12568767      | This study                   |
| KR4114 | <i>ΔctpA::tetAR ΔsspB::aadA ΔCCNA_01553::hyg</i>                                                   | SAMN12568768      | This study                   |
| KR4104 | <i>ΔctpA::tetAR ΔsspB::aadA ΔCCNA_03733::hyg</i>                                                   | SAMN12568766      | This study                   |
| KR4102 | <i>ΔctpA::tetAR ΔsspB::aadA Δfur::hyg</i>                                                          | SAMN12568764      | This study                   |
| KR4103 | <i>ΔlpxC::tetAR ΔsspB::aadA Δfur::hyg</i>                                                          | SAMN12568765      | This study                   |
| KR4176 | <i>ΔctpA::tetAR ΔsspB::aadA Δfur::hyg pZIK175</i>                                                  |                   | This study                   |
| KR4270 | <i>ΔctpA::tetAR ΔsspB::aadA Δfur::hyg pZIK197</i>                                                  |                   | This study                   |
| KR4177 | <i>ΔctpA::tetAR ΔsspB::aadA Δfur::hyg pXCERN-2</i>                                                 |                   | This study                   |
| KR4178 | <i>ΔlpxC::tetAR ΔsspB::aadA Δfur::hyg pZIK175</i>                                                  |                   | This study                   |
| KR4271 | <i>ΔlpxC::tetAR ΔsspB::aadA Δfur::hyg pZIK197</i>                                                  |                   | This study                   |
| KR4179 | <i>ΔlpxC::tetAR ΔsspB::aadA Δfur::hyg pXCERN-2</i>                                                 |                   | This study                   |
| KR4180 | <i>ΔctpA::tetAR ΔsspB::aadA ΔCCNA_03733::hyg pZIK174</i>                                           |                   | This study                   |
| KR4181 | <i>ΔctpA::tetAR ΔsspB::aadA ΔCCNA_03733::hyg pXCERN-2</i>                                          |                   | This study                   |
| KR4182 | <i>ΔctpA::tetAR ΔsspB::aadA ΔCCNA_00497::hyg pZIK172</i>                                           |                   | This study                   |
| KR4183 | <i>ΔctpA::tetAR ΔsspB::aadA ΔCCNA_00497::hyg pXCERN-2</i>                                          |                   | This study                   |
| KR4148 | <i>ΔlpxC::tetAR ΔsspB::aadA Δfur::hyg pZIK133</i><br>Plasmid re-introduced for complementation     |                   | This study                   |
| KR4149 | <i>ΔlpxC::tetAR ΔsspB::aadA Δfur::hyg pJS14</i>                                                    |                   | This study                   |
| KR4150 | <i>ΔctpA::tetAR ΔsspB::aadA ΔCCNA_03733::hyg pAB6</i><br>Plasmid re-introduced for complementation |                   | This study                   |
| KR4151 | <i>ΔctpA::tetAR ΔsspB::aadA ΔCCNA_03733::hyg pJS14</i>                                             |                   | This study                   |
| KR4264 | NA1000 pZIK200                                                                                     |                   | This study                   |
| KR4147 | NA1000 pZIK171                                                                                     |                   | This study                   |
| KR4170 | NA1000 pZIK179                                                                                     |                   | This study                   |
| KR4489 | <i>ΔCCNA_01217</i>                                                                                 |                   | This study                   |
| KR4549 | <i>ΔCCNA_01217 vanA::01217::FLAG</i>                                                               | pKR438 integrated | This study                   |
| KR4450 | <i>ΔCCNA_01218</i>                                                                                 |                   | This study                   |
| KR4505 | <i>ΔCCNA_01218 vanA::01218::FLAG</i>                                                               | pKR435 integrated | This study                   |
| KR4430 | <i>ΔCCNA_01219</i>                                                                                 |                   | This study                   |
| KR4501 | <i>ΔCCNA_01219 vanA::01219::FLAG</i>                                                               | pKR436 integrated | This study                   |
| EK720  | <i>ΔCCNA_01220</i> also known as KR4431                                                            |                   | (Stankeviciute et al., 2019) |
| KR4530 | <i>ΔCCNA_01220 vanA::01220::FLAG</i>                                                               | pKR437 integrated | This study                   |
| KR4517 | <i>Δfur::hyg ΔsspB::aadA ΔCCNA_01217</i>                                                           |                   | This study                   |
| KR4551 | <i>Δfur::hyg ΔsspB::aadA ΔCCNA_01217 vanA::01217::FLAG</i>                                         | pKR438 integrated | This study                   |
| KR4442 | <i>Δfur::hyg ΔsspB::aadA ΔCCNA_01218</i>                                                           |                   | This study                   |
| KR4503 | <i>Δfur::hyg ΔsspB::aadA ΔCCNA_01218 vanA::01218::FLAG</i>                                         | pKR435 integrated | This study                   |
| KR4438 | <i>Δfur::hyg ΔsspB::aadA ΔCCNA_01219</i>                                                           |                   | This study                   |
| KR4513 | <i>Δfur::hyg ΔsspB::aadA ΔCCNA_01219 vanA::01219::FLAG</i>                                         | pKR436 integrated | This study                   |
| KR4439 | <i>Δfur::hyg ΔsspB::aadA ΔCCNA_01220</i>                                                           |                   | This study                   |
| KR4532 | <i>Δfur::hyg ΔsspB::aadA ΔCCNA_01220 vanA::01220::FLAG</i>                                         | pKR437 integrated | This study                   |
| KR4509 | <i>ΔlpxC::tetAR ΔsspB::aadA Δfur::hyg ΔCCNA_01217</i><br>pZIK133                                   |                   | This study                   |



|        |                                                                                 |                   |            |
|--------|---------------------------------------------------------------------------------|-------------------|------------|
| KR4555 | <i>ΔlpxC::tetAR ΔsspB::aadA Δfur::hyg ΔCCNA_01217 vanA::01217::FLAG pZIK133</i> | pKR438 integrated | This study |
| KR4451 | <i>ΔlpxC::tetAR ΔsspB::aadA Δfur::hyg ΔCCNA_01218 pZIK133</i>                   |                   | This study |
| KR4527 | <i>ΔlpxC::tetAR ΔsspB::aadA Δfur::hyg ΔCCNA_01218 vanA::01218::FLAG pZIK133</i> | pKR435 integrated | This study |
| KR4441 | <i>ΔlpxC::tetAR ΔsspB::aadA Δfur::hyg ΔCCNA_01220 pZIK133</i>                   |                   | This study |
| KR4545 | <i>ΔlpxC::tetAR ΔsspB::aadA Δfur::hyg ΔCCNA_01220 vanA::01220::FLAG pZIK133</i> | pKR437 integrated | This study |
| KR4205 | <i>ΔctpA::tetAR ΔsspB::aadA</i> suppressor isolate #3                           | SAMN11107060      | This study |
| KR4206 | <i>ΔctpA::tetAR ΔsspB::aadA</i> suppressor isolate #8                           | SAMN11107061      | This study |
| KR4207 | <i>ΔctpA::tetAR ΔsspB::aadA</i> suppressor isolate #16                          | SAMN11107062      | This study |
| KR4208 | <i>ΔctpA::tetAR ΔsspB::aadA</i> suppressor isolate #21                          | SAMN11107063      | This study |
| KR4209 | <i>ΔctpA::tetAR ΔsspB::aadA</i> suppressor isolate #32                          | SAMN11107064      | This study |
| KR4210 | <i>ΔctpA::tetAR ΔsspB::aadA</i> suppressor isolate #36                          | SAMN11107065      | This study |
| KR4211 | <i>ΔctpA::tetAR ΔsspB::aadA</i> suppressor isolate #38                          | SAMN11107066      | This study |
| KR4212 | <i>ΔctpA::tetAR ΔsspB::aadA</i> suppressor isolate #40                          | SAMN11107067      | This study |
| KR4213 | <i>ΔctpA::tetAR ΔsspB::aadA</i> suppressor isolate #43                          | SAMN11107068      | This study |
| KR4214 | <i>ΔctpA::tetAR ΔsspB::aadA</i> suppressor isolate #44                          | SAMN11107069      | This study |
| KR4215 | <i>ΔctpA::tetAR ΔsspB::aadA</i> suppressor isolate #47                          | SAMN11107070      | This study |
| KR4216 | <i>ΔctpA::tetAR ΔsspB::aadA</i> suppressor isolate #52                          | SAMN11107071      | This study |
| KR4217 | <i>ΔctpA::tetAR ΔsspB::aadA</i> suppressor isolate #53                          | SAMN11107072      | This study |
| KR4218 | <i>ΔctpA::tetAR ΔsspB::aadA</i> suppressor isolate #54                          | SAMN11107073      | This study |
| KR4219 | <i>ΔctpA::tetAR ΔsspB::aadA</i> suppressor isolate #57                          | SAMN11107074      | This study |
| KR4220 | <i>ΔctpA::tetAR ΔsspB::aadA</i> suppressor isolate #111                         | SAMN11107075      | This study |
| KR4221 | <i>ΔctpA::tetAR ΔsspB::aadA</i> suppressor isolate #112                         | SAMN11107076      | This study |
| KR4224 | <i>ΔlpxC::tetAR ΔCCNA_00497::hyg</i> suppressor isolate #1                      | SAMN11107077      | This study |
| KR4225 | <i>ΔlpxC::tetAR ΔCCNA_00497::hyg</i> suppressor isolate #5                      | SAMN11107078      | This study |

<sup>a</sup> For all strains designated “suppressor isolate,” additional genotype information is available in Table S1 or Table S2.

<sup>b</sup>BioSample Accession numbers refer to genome resequencing data for the indicated strains in the Sequence Read Archive at <https://www.ncbi.nlm.nih.gov/sra>, under BioProject ID PRJNA526705

**Table S7, related to STAR Methods: Plasmids used in this study.**

| Name       | Description                                                                                                                                  | Reference                        |
|------------|----------------------------------------------------------------------------------------------------------------------------------------------|----------------------------------|
| pJS14      | Broad host range cloning vector; high copy; chlor <sup>R</sup> ; pBBR1MCS derivative with unique EcoRI site                                  | (J. Skerker, unpublished)        |
| pNPTS138   | kan <sup>R</sup> ; sacB-containing integration vector                                                                                        | (M.R. Alley, unpublished)        |
| pXCERN-2   | For integration at P <sub>xyiX</sub> ; encodes xylose-inducible <i>cerulean</i> that can be exchanged for gene of interest; kan <sup>R</sup> | (Thanbichler et al., 2007)       |
| pMCS-2     | For integration at locus specified by insert sequence; kan <sup>R</sup>                                                                      | (Thanbichler et al., 2007)       |
| pAB6       | pJS14-P <sub>xyiX</sub> - <i>ctpA</i> -3xFLAG- <i>ssrA</i>                                                                                   | (Shapland et al., 2011)          |
| pZIK133    | pJS14-P <sub>xyiX</sub> - <i>lpxC</i> -3xFLAG- <i>ssrA</i>                                                                                   | This study                       |
| pZIK172    | pXCERN-2-P <sub>xyiX</sub> - <i>CCNA_00497</i>                                                                                               | This study                       |
| pZIK173    | pXCERN-2-P <sub>xyiX</sub> - <i>CCNA_01553</i>                                                                                               | This study                       |
| pZIK174    | pXCERN-2-P <sub>xyiX</sub> - <i>CCNA_03733</i>                                                                                               | This study                       |
| pZIK175    | pXCERN-2-P <sub>xyiX</sub> - <i>CCNA_00055 (fur)</i>                                                                                         | This study                       |
| pZIK78     | pNPTS138- <i>CCNA_00497::hyg</i> ; for replacing <i>CCNA_00497</i> with hygromycin resistance cassette                                       | This study                       |
| pZIK82     | pNPTS138- <i>CCNA_01055::hyg</i> ; for replacing <i>CCNA_01055</i> with hygromycin resistance cassette                                       | This study                       |
| pZIK81     | pNPTS138- <i>CCNA_01068::hyg</i> ; for replacing <i>CCNA_01068</i> with hygromycin resistance cassette                                       | This study                       |
| pZIK73     | pNPTS138- <i>CCNA_01553::hyg</i> ; for replacing <i>CCNA_01553</i> with hygromycin resistance cassette                                       | This study                       |
| pZIK80     | pNPTS138- <i>CCNA_03733::hyg</i> ; for replacing <i>CCNA_03733</i> with hygromycin resistance cassette                                       | This study                       |
| pZIK161    | pNPTS138- <i>CCNA_00055::hyg</i> ; for replacing <i>fur</i> with hygromycin resistance cassette                                              | This study                       |
| pZIK134    | pNPTS138- <i>CCNA_02064::tetAR</i> ; for replacing <i>lpxC</i> with tetracycline resistance cassette                                         | This study                       |
| pHP45Ω-hyg | For isolating <i>hyg</i> fragment; hyg <sup>R</sup> ; amp <sup>R</sup>                                                                       | (Blondelet-Rouault et al., 1997) |
| pKOC3      | Contains <i>tetAR</i> flanked by EcoRI sites; amp <sup>R</sup> ; tet <sup>R</sup>                                                            | (Skerker et al., 2005)           |
| pVMCS-4    | For amplification of <i>aacC1</i> ; gent <sup>R</sup>                                                                                        | (Thanbichler et al., 2007)       |
| pMCS-4     | For single integration to disrupt genomic loci; gent <sup>R</sup>                                                                            | (Thanbichler et al., 2007)       |
| pVGFPC-2   | Complementation vector for expressing target genes from <i>vanA</i> locus; kan <sup>R</sup>                                                  | (Thanbichler et al., 2007)       |

|          |                                                                                              |                              |
|----------|----------------------------------------------------------------------------------------------|------------------------------|
| pVGFPC-4 | Complementation vector for expressing target genes from <i>vanA</i> locus; gent <sup>R</sup> | (Thanbichler et al., 2007)   |
| pVCHYC-5 | Complementation vector for expressing target genes from <i>vanA</i> locus; tet <sup>R</sup>  | (Thanbichler et al., 2007)   |
| pFLGC-1  | Vector for adding FLAG tag to the C-terminus of open reading frames; spec <sup>R</sup>       | (Thanbichler et al., 2007)   |
| pGS74    | pNPTS138-based plasmid for markerless deletion of <i>CCNA_01217</i>                          | This study                   |
| pEK406   | pVCHYC-5-based complementing vector, <i>vanA::CCNA_01217-FLAG</i>                            | This study                   |
| pKR438   | pVGFPC-4-based complementing vector, <i>vanA::CCNA_01217-FLAG</i>                            | This study                   |
| pKR429   | pNPTS138-based plasmid for markerless deletion of <i>CCNA_01218</i>                          | This study                   |
| pKR432   | <i>CCNA_01218::FLAG</i> in pFLGC-1                                                           | This study                   |
| pKR435   | pVGFPC-2-based complementation vector, <i>vanA::CCNA_01218-FLAG</i>                          | This study                   |
| pGS76    | pNPTS138-based plasmid for markerless deletion of <i>CCNA_01219</i>                          | This study                   |
| pKR433   | <i>CCNA_01219::FLAG</i> in pFLGC-1                                                           | This study                   |
| pKR436   | pVGFPC-2-based complementation vector, <i>vanA::CCNA_01219-FLAG</i>                          | This study                   |
| pEK722   | pNPTS138-based plasmid for markerless deletion of <i>CCNA_01220</i>                          | (Stankeviciute et al., 2019) |
| pKR434   | <i>CCNA_01220::FLAG</i> in pFLGC-1                                                           | This study                   |
| pKR437   | pVGFPC-2-based complementation vector, <i>vanA::CCNA-01220-FLAG</i>                          | This study                   |
| pKR438   | pVGFPC-4-based complementation vector, <i>vanA::CCNA-01217-FLAG</i>                          | This study                   |

**Table S8, related to STAR Methods: Primers used in this study.**

| Name             | Sequence (5'-3')                  |
|------------------|-----------------------------------|
| pJS14-PxylX      | AGAACTAGTGGATCCTCACATGGTCTCGAA    |
| PxylX-lpxC R     | ACCCGAAGCCGACACGGCGTCGTCTCCCA     |
| PxylX-lpxC F     | TGGGGAGACGACGCCGTGTCCGGCTTCGGGT   |
| lpxC-3xFLAG R    | GTAGTCCATGGATCCAACCGCTTCTGCAAG    |
| lpxC-3xFLAG F    | CTTGCAGAAGCGGTTGGATCCATGGACTAC    |
| ssrA-pJS14       | CTTGATATCGAATTCTCACGCAGCGACGGC    |
| pVCERN-2 00497 F | ACGCATATGAACAGCATTCTCCCG          |
| pVCERN-2 00497 R | CCGGAGCTCCTAGATCGGCCGGCC          |
| pVCERN-2 01553 F | ACGCATATGAAGCGTATGTTTGAT          |
| pVCERN-2 01553 R | CCGGAGCTCCTAACGGGTGACGCC          |
| pVCERN-2 03733 F | ACGCATATGGCTGCGATCTATCCG          |
| pVCERN-2 03733 R | CCGGAGCTCTCAACGCGGCTTCGT          |
| Pvan-fur         | GAGGAAACGCATATGGATCGACTCGAAAAG    |
| fur-pVCERN       | AATTCTCCGGAGCTCTTACTCCTCCAGCGG    |
| 3xFLAG-F         | cgccggcgatccatggactacaaag         |
| 3xFLAG-JS14      | CTTGATATCGAATTCTCACTTGTCATCGTCATC |
| 00497::hyg UpF   | CTCACTAGTAGGACGACGCCATA           |
| 00497::hyg UpR   | ATCCCCGGGGGCAAGGGTCGAGAC          |
| 00497::hyg DownF | ATCCCCGGGCGCCCGCTGCTGTGG          |
| 00497::hyg DownR | AGCGAATTCACCGAGGATTTGGTT          |
| 01055::hyg UpF   | CTCACTAGTGCTGGCGCTGGAAGA          |
| 01055::hyg UpR   | ACCGGATCCTTGAGCGCCATGGGC          |
| 01055::hyg DownF | ACCGGATCCGATGGACGAGCGCAG          |
| 01055::hyg DownR | AGCGAATTCTACGATGACGAGTCG          |
| 01068::hyg UpF   | CTCACTAGTGCGCGAGGACACCGT          |
| 01068::hyg UpR   | ACCGGATCCGACGCCTGGGTGGCG          |
| 01068::hyg DownF | ACCGGATCCCAGGCGGCGCCATAT          |
| 01068::hyg DownR | AGCGAATTCTTGACCTGCTTGAGC          |
| 01553 UpF        | AAAACCTAGTATCGAGCAGGGCGTC         |
| 01553 UpR        | GGCCCCGGGATCAAACATACGCTT          |
| 01553 DownF      | ATCCCCGGGCGCGGTGCTGACCGCA         |
| 01553 DownR      | AAAGAATTCTATGCCGCCAAGCT           |
| 03733::hyg UpF   | CTCACTAGTGACGCTGGCCCTTGT          |
| 03733::hyg UpR   | ACCGGATCCGAAGGCGTGATCGAG          |

|                  |                                                      |
|------------------|------------------------------------------------------|
| 03733::hyg DownF | ACCGGATCCGCCGCCACACAGGAT                             |
| 03733::hyg DownR | AGCGAATTCATGCTCAAGGACCTC                             |
| fur UpF          | CTCACTAGTAAGAGGGTGACCTCG                             |
| fur UpR          | ACCGGATCCGAGCTCTACGGGATG                             |
| fur DownF        | ACCGGATCCTTCGATACAGGCCTT                             |
| fur DownR        | AGCGAATTCTATATGCAGGCCTTC                             |
| lpxC KO F        | CTTCGAAACGGCCGATGATG                                 |
| lpxC KO R        | GATCAACAACGCCGATGACG                                 |
| lpxC UpF         | CTCACTAGTTCAGATAGGCTTCGA                             |
| lpxC UpR         | CATGAATTCCTCAATAACGCCGTG                             |
| lpxC DownF       | CTTGAATTCCGTGTGCTGAAAATA                             |
| lpxC DownR       | GACGCATGCTGGCCGCAAGCCGCG                             |
| aacC1 EcoRI F    | CGCGAATTCgaattgacataagcc                             |
| aacC1 EcoRI R    | GGGAATTCgaattggccgcgcg                               |
| ctpA KO F        | GAAGAAGCGCGGGATCAAGA                                 |
| ctpA KO R        | GTTGCCATGCTTGATGTGCA                                 |
| EK897            | AAGCTTGGCGCCAGCCGG                                   |
| EK898            | GAATTCGCTAGCTTCGGC                                   |
| EK1047           | gctggcgccaagcttAGGCGCTCGATCTGATCTTG                  |
| EK1048           | caggaagatCGGCCCTTTTTGAACTTCAC                        |
| EK1049           | aagggccgATCTTCCTGGCCCTCTTC                           |
| EK1050           | cgaagctagcgaattcCTTGATCGTCGGGTTCTC                   |
| EK1055           | gctggcgccaagcttGGCTTCTTCCACAACCTTG                   |
| EK1056           | accttgagGAGGACCCCGGACATATC                           |
| EK1057           | gggtcctcCTCAAGGTCTGGAGAGAG                           |
| EK1058           | cgaagctagcgaattcCGTCATCTGTCGTCCCTAC                  |
| 01218 up_fwd     | attgaagccggctggcgccaTGGCACGGCCATTTCCGGC              |
| 01218 up_rev     | tgagcccaaaGCCGTCGATCACCAGCAAG                        |
| 01218 down_fwd   | gatcgacggcTTTGGGCTCAAGCCGTTCCG                       |
| 01218 down_rev   | cgtcacggccgaagctagcgGCCGTTCCGACAAGCCGCG              |
| EK1357           | tactcatATGAGTAGTGAAGTTCAAAAAGGGCCG                   |
| EK1358           | tactgctagcTTActgtcatgcatcctttagtcTTTCGCCAGCCAGGACTGG |
| EK S216          | ACCCCGTCTGATAAAGGCTTC                                |
| EK S217          | GCGAGACCGTGATCGACT                                   |
| EK S238          | GTAGGCAGGGTCCGACAGT                                  |
| EK S239          | ACCGCAAAGTTGTGGAAGAA                                 |

|              |                                                     |
|--------------|-----------------------------------------------------|
| EK S240      | ATGACCTTCCTCGACACG                                  |
| EK S241      | GAGTCGATCACGGTCTCG                                  |
| EK S242      | AGGGCTTCTTCTTTGGCATT                                |
| EK S243      | ACTTCATCGTCGGCACCTT                                 |
| RecUni-1     | ATGCCGTTTGTGATGGCTTCCATGTCG                         |
| RecVan-2     | CAGCCTTGGCCACGGTTTCGGTACC                           |
| Nde-01218    | TATATTCATATGCTTCGTCTGCACGCCATCC                     |
| 01218-Mlu    | ATTATACGCGTTCCGACCAGGAACCGCAAGGC                    |
| Nde-01219    | TATATTCATATGAGCCGCCTGCGCGGCCTC                      |
| 01219-Mlu    | TAATAACGCGTTGCGGCTTGCCGCCGCTCTC                     |
| Nde-01220    | TATATTCATATGGGGCTATTTGATAAGCACCTGGCC                |
| 01220-Mlu    | AATAACGCGTGGCGCGGGCGCGCTTGAG                        |
| 01217-FLAG F | CCACGATGCGAGGAAACGCATATGAGTAGTGAAGTTCAAAAAG         |
| 01217-FLAG R | AATTAAGGCGCCTGCAGGCAGCTAGCTCACTTGTCATC              |
| 01218-FLAG F | CCACGATGCGAGGAAACGCATATGCTTCGTCTGCACG               |
| 01218-FLAG R | AATTAAGGCGCCTGCAGGCAGCTAGCTTACTTGTCATCGTC           |
| 01219-FLAG F | CCACGATGCGAGGAAACGCATATGAGCCGCCTGCGCGG              |
| 01219-FLAG R | AATTAAGGCGCCTGCAGGCAGCTAGCTTACTTGTCATCGTCATCCTTGTAG |
| 01220-FLAG F | CCACGATGCGAGGAAACGCATATGGGGCTATTTGATAAG             |
| 01220-FLAG R | AATTAAGGCGCCTGCAGGCAGCTAGCTTACTTGTCATC              |
|              |                                                     |

The following primer pairs were used for qRT-PCR analyses of the indicated genes.

| Gene                   | Forward primer (5'-3') | Reverse primer (5'-3') |
|------------------------|------------------------|------------------------|
| <i>CCNA_03142 rpoD</i> | CTCTATGCGATCAACAAGCG   | ATAGGCCTTGAGGAACTCGC   |
| <i>CCNA_03372 bfd</i>  | GTCTGCAACTGTAACGGCATC  | CAGCCCTTGTGACGGAAG     |
| <i>CCNA_00793 sgt1</i> | AGCCTTTGTCAGGACCAGAA   | CACCACCTCGTCGAGAATTT   |
| <i>CCNA_00792 sgt2</i> | CCACGAGCTGTTTCGTCATC   | TGTAGTAGTTGGCGTCAAACG  |
| <i>CCNA_01217 cpgA</i> | GTCACCTTCATCGGCTTTGT   | CGAGGAAGGTCATGATCCAG   |
| <i>CCNA_01218 cpgB</i> | GAGAGAACCCGACGATCAAG   | CAGGTTGGTGGCCTTCAC     |
| <i>CCNA_01219 cpgC</i> | CCGGGGTCCTCGACTACTAC   | CCGTGCTCAAACCTCGTGATA  |
| <i>CCNA_02064 lpxC</i> | TTGTTGATCACCGTGCCGAG   | CCGACATGGGGATCGTCTTT   |
